# Supplementary material for: RmtA, a Putative Arginine Methyltransferase, Regulates Secondary Metabolism and Development in Aspergillus flavus
Source: PubMed Central journal article supplement (PMC4877107; doi:10.1371/journal.pone.0155575), 2016-05-23

**S2 Fig. Multiple sequence alignment of *A. flavus* RmtA, RmtB, and RmtC, and phylogenetic analysis of these protein sequences and those of their putative homologs in *A. nidulans*.** (A) Sequences alignment of *A. flavus* RmtA, RmtB (EED57275.1), and RmtC (EED50528.1) using Muscle (<http://www.ebi.ac.uk/Tools/msa/muscle/>). Alignment was visualized with BoxShade v3.21 ([http://ch.embnet.org/software/BOX\\_form.html](http://ch.embnet.org/software/BOX_form.html)). (B) Phylogenetic tree of RmtA, RmtB, and RmtC from *A. flavus* and *A. nidulans*. Accession numbers for *A. nidulans* RmtB and RmtC sequence are XP\_660700.1 and XP\_657738.1 respectively. The phylogenetic tree was constructed using MEGA v6.0, and it was generated with Maximum-Likelihood model with a bootstrap value of 1000.

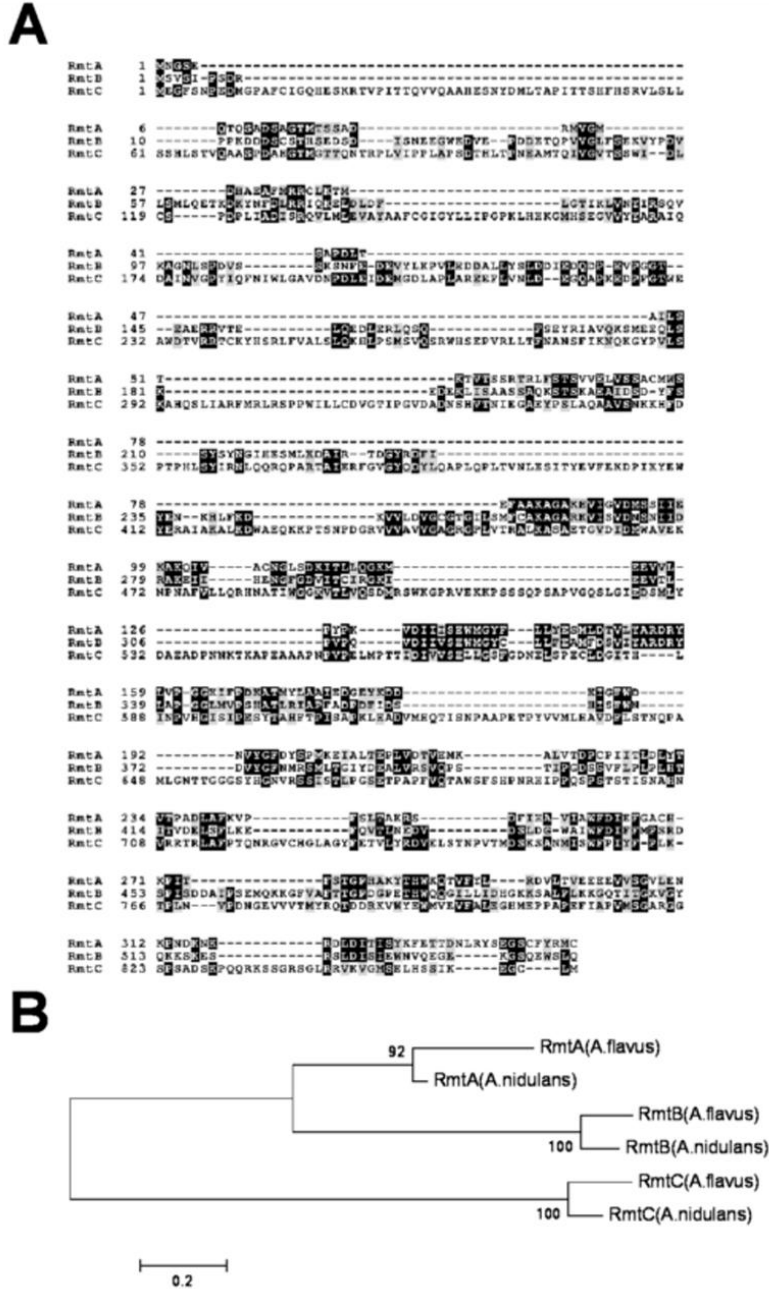

Supplement: pone.0155575.s002.pdf [file pone.0155575.s002.pdf]
