# Supplementary material for: RmtA, a Putative Arginine Methyltransferase, Regulates Secondary Metabolism and Development in Aspergillus flavus
Source: PubMed Central journal article supplement (PMC4877107; doi:10.1371/journal.pone.0155575), 2016-05-23

**S3 Fig. Evaluation of colony growth.** (A) Images of point-inoculated cultures of *A. flavus* wild type (WT),  $\Delta rmtA$ , complementation (com) and OErmtA (OE) strains growing on PDA after 7 days of incubation at 30 °C. (B) Quantification of colony growth as colony diameter of cultures in (A). Different letters on the columns indicate values that are statistically different ( $p < 0.05$ ).

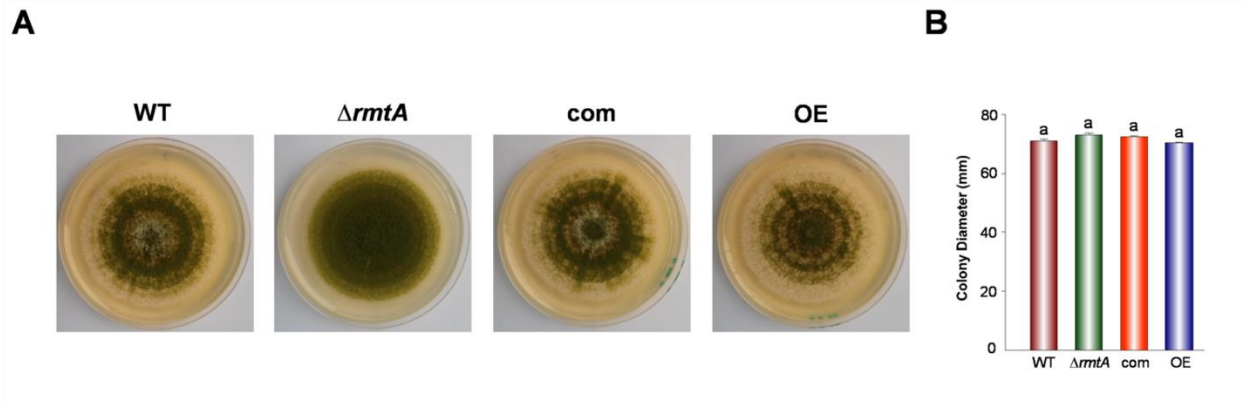

Supplement: pone.0155575.s003.pdf [file pone.0155575.s003.pdf]
