# Supplementary material for: RmtA, a Putative Arginine Methyltransferase, Regulates Secondary Metabolism and Development in Aspergillus flavus
Source: PubMed Central journal article supplement (PMC4877107; doi:10.1371/journal.pone.0155575), 2016-05-23

**S4 Fig. Effect of *rmtA* on sclerotial production on GMM-sorbitol.** *A. flavus* wild type (WT),  $\Delta rmtA$ , complementation (*com*) and OE*rmtA* (OE) strains were point-inoculated and grown on GMM-sorbitol medium for 7 days at 30 °C. Plates were then sprayed with ETOH and micrographs were taken approximately 1.5 cm from center at 12.5X magnification using a Leica MZ75 dissecting microscope coupled with a Leica DC SOLP camera.

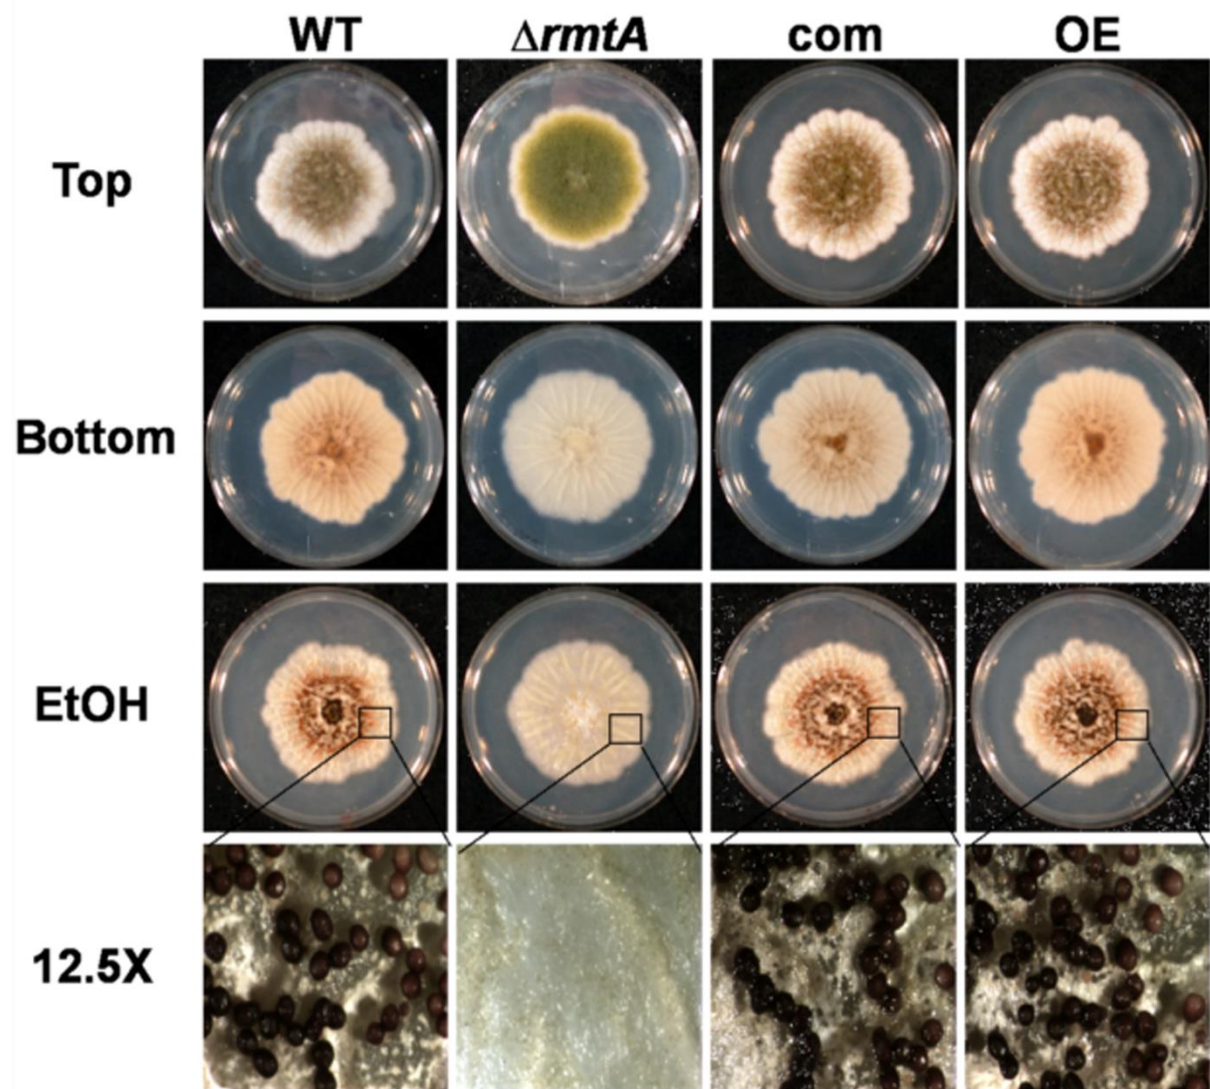

Supplement: pone.0155575.s004.pdf [file pone.0155575.s004.pdf]
