# Supplementary material for: RmtA, a Putative Arginine Methyltransferase, Regulates Secondary Metabolism and Development in Aspergillus flavus
Source: PubMed Central journal article supplement (PMC4877107; doi:10.1371/journal.pone.0155575), 2016-05-23

**S5 Fig. Effect of *rmtA* on sclerotial production on Wickerham medium.** *A. flavus* wild type (WT),  $\Delta rmtA$ , complementation (com) and O*E**rmtA* (OE) strains were point-inoculated on Wickerham medium and incubated for 7 days (A) and 17 days (B) at 30 °C. Plates were then sprayed with ethanol and micrographs of sclerotia were obtained approximately 1.5 cm from the center at 12.5X magnification using a Leica MZ75 dissecting microscope.

**A**

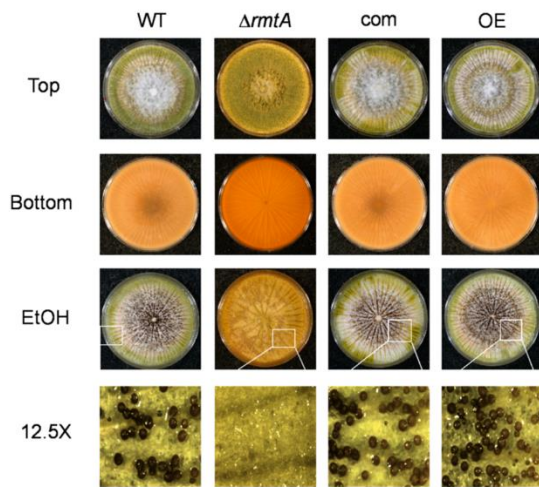

**B**

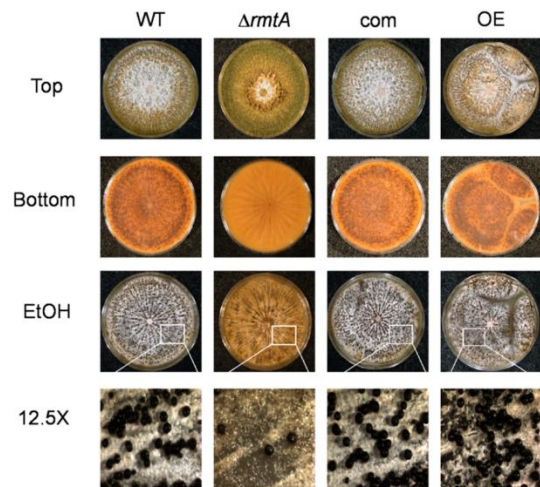

Supplement: pone.0155575.s005.pdf [file pone.0155575.s005.pdf]
