# Supplementary material for: RmtA, a Putative Arginine Methyltransferase, Regulates Secondary Metabolism and Development in Aspergillus flavus
Source: PubMed Central journal article supplement (PMC4877107; doi:10.1371/journal.pone.0155575), 2016-05-23
Supplement: pone.0155575.s006.pdf [file pone.0155575.s006.pdf]

**Table S1. Primers used in this study.**

| Name               | Sequence (5'→3')                                                                       |
|--------------------|----------------------------------------------------------------------------------------|
| Afl_rmtA_p1        | CGAGATAAGCCGTGCCAATGGGC                                                                |
| Afl_rmtA_p2        | GAAAGAAAAGAAGCAAGCAAAGCAACTAGAGGG                                                      |
| Afl_rmtA_p3        | GTATTGGATCTGGTGAATCGTGGCACG                                                            |
| Afl_rmtA_p4        | CACAGGCGAAGCAAAGCGTGCCT                                                                |
| Afl_rmtA_p5        | CCCTCTAGTTTGCTTGCTTCTTTTCTTTCACCGGTCGCCTCAAACAATGCTCT                                  |
| Afl_rmtA_p6        | CGTGCCACGATTACCAGATCCAATACGTCTGAGAGGAGGCACTGATGCG                                      |
| Afl_rmtA_p7        | CGGAGATGGAAAGCTAGGGAGGACG                                                              |
| Afl_rmtA_p8        | CGAGGTGGAGACTATCTCACCGATAGAG                                                           |
| AFL_RMTA_F         | ATAGAGGGATCCGGATGAACGGATCGGAGCAGACACAATCCATAGAGGGATCC<br>GGATGAACGGATCGGAGCAGACACAATCC |
| AFL_RMTA_R         | TAGTGCTCGAGTTACATTCTATAGAAGCAGCTACCCTCGGAGTAACG                                        |
| 12228-pyrG_Afum_F  | GATGTGACGACAACCCGAGAACTCC                                                              |
| 12229-pyrG_Afum_R  | GAGCAGCGTAGATGCCTCGAC                                                                  |
| comp RMTA_flavus_F | NNNNNNNCTGCAGGGAATATCCTGATAATTGCCAGG                                                   |
| comp RMTA_flavus_R | NNNNNNNNNNNGCGGCCGCCCAATAACCGTATTACGCAACT                                              |
| OE_RMTA_F          | NNNNNNGGCGCGCCATGAACGGATCGGAGCAGACAC                                                   |
| OE_RMTA_R          | NNNNNNGCGGCCGCCGGGTATCTACTTGTGTAATTCGAGGAGC                                            |
| gdpApromoF         | AAGTACTTTGCTACATCCATACTCC                                                              |
| ver1-Nor-S         | ATGTCCGACAACCACCGTTTAG                                                                 |
| ver1-Nor-A         | TCATCGAAAAGCGCCGCCA                                                                    |
| qPCR-Afla_rmta_F   | CTTCTCTCTTACCGCCAAGCGCAGCGACTTCATCC                                                    |
| qPCR-Afla_rmta_R   | GGGCTTGTTCTCCAACACTCCCAGAAACGACTTCCTC                                                  |
| qPCR-Afla_18S_F    | TGATGACCCGCTCGGCACCTTACGAGAAATCAAAGT                                                   |
| qPCR-Afla_18S_R    | GGCCATGCACCACCATCCAAAAGATCAAGAAAGAGC                                                   |
| qPCR-Afla_brlA_F   | TATCCAGACATTCAAGACGCACAG                                                               |
| qPCR-Afla_brlA_R   | GATAATAGAGGGCAAGTTCTCCAAAG                                                             |
| qPCR-Afla_aflR_F   | GCAACCTGATGACGACTGATATGG                                                               |
| qPCR-Afla_aflR_R   | TGCCAGCACCTTGAGAACGATAAG                                                               |
| qPCR-Afla_aflJ_F   | TGGAATATGGCTGTAGGAAGTG                                                                 |
| qPCR-Afla_aflJ_R   | CATCCGAGTGAGCGTATCC                                                                    |
| qPCR_Afla_abaA_F   | GTACGGGAGCAACCAGCAGAC                                                                  |
| qPCR_Afla_abaA_R   | GTTGCCTCGGCGTGCAAATT                                                                   |
| qPCR_Afla_wetA_F   | GGGCTGTTACGCCTGATCT                                                                    |
| qPCR_Afla_wetA_R   | GACCCCTTGCAGGATGTCA                                                                    |
| qPCR_Afla_veA_F    | ATCATCCAGCAGTACCTCTCCAGAGCCCCAGTCACGA                                                  |
| qPCR_Afla_veA_R    | CCGACTGGCATCTGACAGCCTCCGAGGATAACTTTC                                                   |
