# Supplementary material for: RmtA, a Putative Arginine Methyltransferase, Regulates Secondary Metabolism and Development in Aspergillus flavus
Source: PubMed Central journal article supplement (PMC4877107; doi:10.1371/journal.pone.0155575), 2016-05-23
Supplement: pone.0155575.s007.pdf [file pone.0155575.s007.pdf]

**S2 Table. Sequence comparison of RmtA in other fungal species.**

| Species                          | Accession #    | E-Value   | Similarity | Identity |
|----------------------------------|----------------|-----------|------------|----------|
| <i>Aspergillus oryzae</i>        | XP_001818952.2 | 0         | 100        | 100      |
| <i>Aspergillus terreus</i>       | XP_001212165.1 | 0         | 96         | 91.5     |
| <i>Aspergillus fumigatus</i>     | XP_750368.2    | 0         | 93.5       | 89.5     |
| <i>Aspergillus kawachii</i>      | GAA89995.1     | 0         | 94.9       | 93.5     |
| <i>Aspergillus niger</i>         | XP_001398973.2 | 0         | 95.2       | 94.1     |
| <i>Aspergillus nidulans</i>      | CBF74424.1     | 0         | 91.2       | 86.9     |
| <i>Neurospora crassa</i>         | XP_963910.1    | 0         | 82.7       | 71.1     |
| <i>Fusarium graminearum</i>      | ESU06416.1     | 0         | 80.4       | 69       |
| <i>Cryptococcus neoformans</i>   | XP_569187.1    | 8.00E-153 | 73.7       | 59.6     |
| <i>Schizosaccharomyces pombe</i> | NP_594825.2    | 9.00E-153 | 73         | 62.3     |
| <i>Saccharomyces cerevisiae</i>  | NP_009590.1    | 1.00E-148 | 71.2       | 59.2     |
| <i>Candida albicans</i>          | XP_718383.1    | 6.00E-133 | 68.2       | 53.8     |
| <i>Rhodosporidium toruloides</i> | EMS18785.1     | 3.00E-158 | 75.9       | 61.9     |
| <i>Puccinia graminis</i>         | XP_003335266.2 | 2.00E-156 | 73.6       | 59.7     |
| <i>Trichosporon asahii</i>       | EJT52753.1     | 3.00E-155 | 73.8       | 61.3     |
| <i>Coprinopsis cinerea</i>       | XP_001830750.2 | 6.00E-143 | 69.4       | 56.7     |
