# Supplementary material for: RmtA, a Putative Arginine Methyltransferase, Regulates Secondary Metabolism and Development in Aspergillus flavus
Source: PubMed Central journal article supplement (PMC4877107; doi:10.1371/journal.pone.0155575), 2016-05-23
Supplement: pone.0155575.s008.pdf [file pone.0155575.s008.pdf]

**S3 Table. Sequence Comparison of RmtA in eukaryotic model organisms.**

| Species                              | Accession #    | E-Value   | Similarity | Identity |
|--------------------------------------|----------------|-----------|------------|----------|
| <i>Aspergillus nidulans</i>          | CBF74424.1     | 0         | 91.2       | 86.9     |
| <i>Schizosaccharomyces pombe</i>     | NP_594825.2    | 9.00E-153 | 73         | 62.3     |
| <i>Saccharomyces cerevisiae</i>      | NP_009590.1    | 1.00E-148 | 71.2       | 59.2     |
| <i>Homo sapiens</i>                  | CAA71763.1     | 9.00E-136 | 70.4       | 55.2     |
| <i>Arabidopsis thaliana</i>          | NP_194680.1    | 3.00E-135 | 62.1       | 47.2     |
| <i>Xenopus (Silurana) tropicalis</i> | NP_001005629.2 | 3.00E-135 | 69.4       | 54.3     |
| <i>Danio rerio</i>                   | XP_005164044   | 9.00E-135 | 68.1       | 54.4     |
| <i>Mus musculus</i>                  | NP_062804      | 1.00E-134 | 66.2       | 51.7     |
| <i>Drosophila melanogaster</i>       | CAL26190.1     | 1.00E-133 | 66         | 49.7     |
| <i>Caenorhabditis elegans</i>        | NP_507909.1    | 2.00E-125 | 67.9       | 52.5     |
